# Supplementary material for: Suicide Rate and Social Environment Characteristics in South Korea: The Roles of Socioeconomic, Demographic, Urbanicity, General Health Behaviors, and Other Environmental Factors On Suicide Rate
Source: Research Square preprint supplement (doi:10.21203/rs.3.rs-817624/v1), 2021-09-09
Supplement: Supplementary file 1 [file 427d6b02357b784319086eb6.docx]

**Supplementary Materials**

**Title.** Suicide rate and social environment characteristics in South Korea: the roles of socioeconomic, demographic, urbanicity, general health behaviors, and other environmental factors on suicide rate.

**Authors.** Hyemin Jang, Whanhee Lee, Yong-ook Kim, and Ho Kim

***Corresponding author**. Ho Kim, PhD.Department of Public Health Science, Graduate School of Public Health, & Institute for Sustainable Developemnt, Seoul National University, (Address) 1 Gwanak-ro, Gwanak-gu, Seoul 151-742, Republic of Korea. Telephone: (82) 2 880-2702. E-mail: hokim@snu.ac.kr

**Information on social environment indicators**

| **Variable name** | **Definition** | **Unit** | **Survey years** | | | | | | | | | | |
| --- | --- | --- | --- | --- | --- | --- | --- | --- | --- | --- | --- | --- | --- |
| **08** | **09** | **10** | **11** | **12** | **13** | **14** | **15** | **16** | **17** | **18** |
| Total suicide rate | Standardized total mortality rate by suicide(X60-X84) per 100,000 persons (standardized based on the 2005 mid-year population) | Person/ 100,000 persons | O | O | O | O | O | O | O | O | O | O | O |
| Male suicide rate | Standardized male mortality rate by suicide(X60-X84) per 100,000 persons (standardized based on the 2005 mid-year population) | Person/ 100,000 persons | O | O | O | O | O | O | O | O | O | O | O |
| Female suicide rate | Standardized female mortality rate by suicide(X60-X84) per 100,000 persons (standardized based on the 2005 mid-year population) | Person/ 100,000 persons | O | O | O | O | O | O | O | O | O | O | O |
| Aged 10~39y suicide rate | Standardized aged 10~39 mortality rate by suicide(X60-X84) per 100,000 persons (standardized based on the 2005 mid-year population) | Person/ 100,000 persons | O | O | O | O | O | O | O | O | O | O | O |
| Aged 40~59y suicide rate | Standardized aged 40~59 mortality rate by suicide(X60-X84) per 100,000 persons (standardized based on the 2005 mid-year population) | Person/ 100,000 persons | O | O | O | O | O | O | O | O | O | O | O |
| Aged 60+y suicide rate | Standardized aged 60 and older mortality rate by suicide(X60-X84) per 100,000 persons (standardized based on the 2005 mid-year population) | Person/ 100,000 persons | O | O | O | O | O | O | O | O | O | O | O |
| % population aged 65 and older eligible for the basic pension | Percentage of people aged 65 and older who receive basic pensions | % | X | X | X | X | X | X | X | O | O | O | O |
| % vacant houses in the area | (Number of empty houses/Total houses)*100 | % | X | X | O | X | X | X | X | O | O | O | O |
| % divorce | (Number of divorces reported in one year / mid-year population)x1000 *Counting administrative districts based on husband's address | Case/ 1,000 persons | O | O | O | O | O | O | O | O | O | O | O |
| % single elderly households | The proportion of the elderly (65 years of age or older) who live alone among those aged 65 and over. *Ratio of elderly living alone=(number of single-person households aged 65 and over/number of people aged 65 and over)*100 | % | X | X | O | X | X | X | X | O | O | O | O |
| % detached houses | The proportion of detached houses (general, multi-household, detached house with shop) among housings *Detached house : A single-person owned house that cannot be owned or sold separately even if it is designed for multiple households | % | X | X | O | X | X | X | X | O | O | O | O |
| % people who regularly participated in religious activities | Persons who regularly participate in social activities (religious activities) at least once a month/respondents surveyed X 100 *Age-standardized based on the 2005 estimated population | % | X | X | X | O | X | O | X | O | X | O | X |
| Number of sports facilities per 1,000 persons | Number of sports facility/resident registered population*1000 | Unit/ 1,000 persons | O | O | O | O | O | O | O | O | O | O | O |
| Park area per person (km2) | Park area per person = Park area/ total number of people | m2/ person | O | O | O | O | O | O | O | O | O | O | O |
| % current smokers | Percentage of people who have smoked more than 5 packs (100 cigarettes) in their lifetime who currently smoke ("every day" or "sometimes") *Age-standardized based on the 2005 estimated population | % | O | O | O | O | O | O | O | O | O | O | O |
| % people exhibiting a high risk drinking | Percentage of people who drank more than twice a week over the past year (more than 7 glasses (or 5 cans of beer) for men and more than 5 glasses (or 3 cans of beer) for women) *Age-standardized based on the 2005 estimated population | % | O | O | O | O | O | O | O | O | O | O | O |
| % population with recognized stress | Persons who responds to "feel a great deal" or "feel a lot" stress in daily life / Respondents surveyed X 100 *Age-standardized based on the 2005 estimated population | % | O | O | O | O | O | O | O | O | O | O | O |
| % population that is obese | Persons with a body mass index(kg/m2) of 25 or higher / Respondents surveyed X 100 (self-report) *Age-standardized based on the 2005 estimated population | % | O | O | O | O | O | O | O | O | O | O | O |
